# Supplementary material for: A photoperiod-responsive protein compendium and conceptual proteome roadmap outline in maize grown in growth chambers with controlled conditions
Source: PLoS One. 2017 Apr 11;12(4):e0174003. doi: 10.1371/journal.pone.0174003 (PMC5388471; doi:10.1371/journal.pone.0174003)
Supplement: S7 Table — (XLS) [file pone.0174003.s007.xls]

## Sheet: Table S7
					S7 Table DPs co-regulated in SM9 by short and long photoperiods
Footnotes: LP, long photoperiod; M9, M9 inbred line; NP, neutral photoperiod; SP, short photoperiod; VT, vegetable-tasseling stage
Hits	Accession	Desription	Mass	Seq	Score	Cov	SameSets	Spectrum	Unique Spectrum	Peptide	Unique Peptide	Expression ratio in the SM9 line at the VT stage under SP as SP vs. NP	Expression significance in the SM9 line at the VT stage under SP as SP vs. NP	C-VS-Z@Mean	C-VS-Z@SD	Accession	NCBInr Identity	NCBInr E_Value	NCBInr Accession	NCBInr Description	Uniprot_Swissprot Identity	Uniprot_Swissprot E_Value	Uniprot_Swissprot Accession	Uniprot_Swissprot Description	Uniprot_Tremble Identity	Uniprot_Tremble E_Value	Uniprot_Tremble Accession	Uniprot_Tremble Description	Protein_or_Domain	COG Identity	COG E-Value	COG_ID	COG Function-Description	COG Code	COG Functional-Categories	KEGG(ko_id|rank|evalue|score|identity|ko_definition)	GO Biological_Process	GO Molecular_Function	GO Cellular_Component
	gnl|ZmGDB|GRMZM2G001514_P01	seq=translation; coord=8:69592559..69594672:1; parent_transcript=GRMZM2G001514_P01; parent_gene=GRM	35480	MATTSTPRLATLLVLLAAASPLLSAAQKAAPKAPAAAKAAPGPAASSSSGAGAADAAPPTDVNKALKDDQFSEFKQLLHDTRVDTQINAQLTDSYNGLTIMAPTNAAFDKMKAGVLNGLSPQDQIQLVLYCVLPRFYSLSMLGTLDGKVNTQGSGHDGPYRYDIKRSGNNVNVSTGVNWMLLGSPVSKDFPLAIYPVDKVPLPYELFGPKPPTPAPAPAPAPAKSKTKKKKKAAGIAEPPTADDDTSASDDQKAAATPGAAGSWAAAALSALAAAALGAGLF	291	8.5	-	15	5	2	1	1.627	*	1.843	0.30547	gnl|ZmGDB|GRMZM2G001514_P01	100	2e-75	gi|413948476|gb|AFW81125.1|	fasciclin-like arabinogalactan protein 7 [Zea mays]	46.48	2e-21	sp|Q9SIL7|FLA6_ARATH	Fasciclin-like arabinogalactan protein 6 OS=Arabidopsis thaliana GN=FLA6 PE=2 SV=2	99.29	1e-48	B6TE21	B6TE21_MAIZE Fasciclin-like arabinogalactan protein 7 OS=Zea mays PE=2 SV=1	-	-	-	-	-	-	-	-	-	-
	gnl|ZmGDB|GRMZM2G010048_P01	seq=translation; coord=5:14814824..14815810:1; parent_transcript=GRMZM2G010048_P01; parent_gene=GRM	26476	MRVSSNPQPHGPEMASVLRVLALLLVAAAVADAASIVVTNKCAYTVWPAALPGGGTVLNTGESWPIDVPAGTRSGRVWGRTGCGFVTNGTLGQCQTGDCGGTLACSKVGFEPITLAEYSLGGTGADRFDISLVHGFNAPMSFLPASGGGGGARCGRGGPSCPVQEITFDCPSEQRRVAGCGNPCDGKSSSCGPNNGTEYFKKACPQTITYPRDTTNTVFTCPAGTSYEITFCP	536	8.6	-	7	7	1	1	1.535	*	1.482	0.0749533	gnl|ZmGDB|GRMZM2G010048_P01	100	4e-103	gi|413933505|gb|AFW68056.1|	putative thaumatin domain family protein [Zea mays]	57.14	4e-22	sp|P50698|RST4_AVESA	Thaumatin-like pathogenesis-related protein 4 OS=Avena sativa GN=RASTL-4 PE=2 SV=1	86.22	3e-87	C5WQD8	C5WQD8_SORBI Putative uncharacterized protein Sb01g012700 OS=Sorghum bicolor GN=Sb01g012700 PE=4 SV=1	-	-	-	-	-	-	-	-	-	-	GO:0016023//cytoplasmic membrane-bounded vesicle
	gnl|ZmGDB|GRMZM2G028307_P02	seq=translation; coord=10:16487570..16504336:1; parent_transcript=GRMZM2G028307_P02; parent_gene=GR	82689	MGARATSPPPWRRHCLCRALHFLVLLLWGTSEANKEQAMLPPRGWNSYDSFSWIVDENAYLQNAQIMTEKLLPHGYQYAVIDFLWYRKYVDGAYTDSYGFDNIDEWGRPFPDLQRFPSSRVDRGFSQIASKVHGMGLKFGIHLMKGISVQAVNADTPILDIKTGKPYLEDGRQWTARDIGLSHRTCAWMTHGFMSVNTNIGAGRAFLRSLYRQYADWGVDFVKVDCIFGTDYSPEEIITISELLQEIDRPIILSISPGTAVTPALAENISDHVNMYRITGDDWDNWKDVSSHFGVSSSFATAKKIGATGLRGRSWPDLDMLPFGWLTDPSVNQGPHRKCNLTLDEQKAQMALWSMTKSPLMYGGDLRNLDDSTLNIITNSGLLKINHYSRNNMEFHYVH…	161	7.3	-	6	6	4	4	2.799	*	2.4215	0.533866	gnl|ZmGDB|GRMZM2G028307_P02	100	2e-124	gi|293333891|ref|NP_001170663.1|	uncharacterized protein LOC100384721 [Zea mays]	37.17	2e-08	sp|A7XZT2|AGALB_TALEM	Probable alpha-galactosidase B OS=Talaromyces emersonii PE=3 SV=1	100	0	C0PAL4	C0PAL4_MAIZE Putative uncharacterized protein OS=Zea mays PE=2 SV=1	-	-	-	-	-	-	-	K07407|1|9e-21|100|gmx:100804260|alpha-galactosidase [EC:3.2.1.22]	-	GO:0004553//hydrolase activity, hydrolyzing O-glycosyl compounds	GO:0005739//mitochondrion
	gnl|ZmGDB|GRMZM2G028821_P01	seq=translation; coord=1:81602813..81603918:-1; parent_transcript=GRMZM2G028821_P01; parent_gene=GR	26441	MAGEEGLKVLGLQVSPFVLRVCLALNMKGVSYEYVEEDISNKSELLLKSNPVHKKVPVLIHNGKPICESLVIMQYVDELFAGRPILPTDPYERATARFWAAYADDKLFPAWYGMVKAQAEEERAEKAKETLAAIEHMEVTFAKCSGGNAFFGGDSIGYVDIVLTCSAPSCSGSRRCAGFSTWRSLTLARLRCWLRGRSGL	94	11	-	4	4	2	2	9.362	*	5.371	5.64413	gnl|ZmGDB|GRMZM2G028821_P01	100	3e-102	gi|195650085|gb|ACG44510.1|	glutathione S-transferase GSTU6 [Zea mays] >gi|414867472|tpg|DAA46029.1| TPA: glutathione S-transferase GSTU6 [Zea mays]	54.74	2e-26	sp|Q9FUT0|GSTU9_ARATH	Glutathione S-transferase U9 OS=Arabidopsis thaliana GN=GSTU9 PE=2 SV=1	100	3e-101	B6U577	B6U577_MAIZE Glutathione S-transferase GSTU6 OS=Zea mays PE=2 SV=1	XF0911	60.8	1e-09	COG0625	Glutathione S-transferase	O	Posttranslational modification, protein turnover, chaperones ;	K00799|1|2e-51|199|sbi:SORBI_01g030930|glutathione S-transferase [EC:2.5.1.18]	GO:0009628//response to abiotic stimulus;GO:0009791//post-embryonic development	GO:0004364//glutathione transferase activity	-
	gnl|ZmGDB|GRMZM2G036134_P01	seq=translation; coord=7:170988796..170991237:1; parent_transcript=GRMZM2G036134_P01; parent_gene=G	49600	MRRVGTGVRMLCGAALSVLLLLAGGAAASHSRSSCPATPPDAGNTLQVSHAFGPCSPLGPGTAAPSWAGFLADQASRDASRLLYLDSLAVRGRARAYAPIASGRQLLQTPTYVVRASLGTPPQQLLLAVDTSNDASWIPCAGCAGCPTSSAAPFDPASSASYRTVPCGSPLCAQAPNAACPPGGKACGFSLTYADSSLQAALSQDSLAVAGNAVKAYTFGCLQRATGTAAPPQGLLGLGRGPLSFLSQTKDMYEATFSYCLPSFKSLNFSGTLRLGRNGQPQRIKTTPLLANPHRSSLYYVNMTGIRVGRKVVPIPAFDPATGAGTVLDSGTMFTRLVAPAYVAVRDEVRRRVGAPVSSLGGFDTCFNTTAVAWPPVTLLFDGMQVTLPEENVVIHSTY…	1070	19.3	-	44	44	8	8	1.848	*	4.494	3.74201	gnl|ZmGDB|GRMZM2G036134_P01	100	0	gi|212275143|ref|NP_001130306.1|	uncharacterized protein LOC100191400 precursor [Zea mays] >gi|414887962|tpg|DAA63976.1| TPA: aspartic proteinase nepenthesin-1 [Zea mays]	35.45	3e-31	sp|Q9LHE3|ASPG2_ARATH	Protein ASPARTIC PROTEASE IN GUARD CELL 2 OS=Arabidopsis thaliana GN=ASPG2 PE=2 SV=1	100	0	B4F8P0	B4F8P0_MAIZE Putative uncharacterized protein OS=Zea mays PE=2 SV=1	-	-	-	-	-	-	-	K00924|1|1e-14|79.3|aly:ARALYDRAFT_489138|[EC:2.7.1.-]	GO:0006508//proteolysis	GO:0004190//aspartic-type endopeptidase activity	GO:0009505//plant-type cell wall;GO:0016023//cytoplasmic membrane-bounded vesicle;GO:0009507//chloroplast;GO:0048046//apoplast
	gnl|ZmGDB|GRMZM2G050730_P01	seq=translation; coord=10:4991168..4992194:1; parent_transcript=GRMZM2G050730_P01; parent_gene=GRMZ	13941	MGEVKHLCLAKFKDGVVVDDVLKGMTDLAAGMDTVKSFEWGQDVLNQEMLTQGFTHVFSLTFASAADLAAYMAHDSHTAFAATFMAAIDKVLVVDFPVVVAKPPPPA	155	23.4	-	4	4	2	2	1.761	*	2.4035	0.908632	gnl|ZmGDB|GRMZM2G050730_P01	100	1e-08	gi|413916098|gb|AFW56030.1|	hypothetical protein ZEAMMB73_733539 [Zea mays]	48.81	3e-16	sp|Q9FK81|Y5258_ARATH	Uncharacterized protein At5g22580 OS=Arabidopsis thaliana GN=At5g22580 PE=1 SV=1	100	1e-31	B6UFF4	B6UFF4_MAIZE Pop3 peptide OS=Zea mays PE=4 SV=1	-	-	-	-	-	-	-	-	-	-	GO:0016023//cytoplasmic membrane-bounded vesicle;GO:0009507//chloroplast
	gnl|ZmGDB|GRMZM2G062613_P01	seq=translation; coord=3:93985804..93989199:1; parent_transcript=GRMZM2G062613_P01; parent_gene=GRM	82781	MKMLRRLMLSLSFILLLPSYLAYPLCTDARAPVLLNTTLKFCASPSRNSRGCCDATADAALSKQFDAMAISDAACAAVVKSILCAKCSPYSADLFGAGPKIRTVPSLCNSTSSANSAESKETTTTTTQDYCKLVWDTCKDVSIASSPFQPPLQGTAPPPTSPSKLTDAWQSQSDFCGSFGGRSSVCLSGDTVSFNAAGPSPSPRPEPRGVCLERIDNGSYLSLAPHPDGSSRIFLGSQAGKIWLATVPEQGSGGALQFEGAGPFVDLTDQVHFDSALGLMGMAFHPGFATNGRFFASYNCDRTKSPSCTGRCSCNSDVGCDPSKLGTDSGAQPCQYQVVVSEYSARGSAAANVSQATSAADPSEVRRIFAMGLPYTSGHGGQVLFGPADGYLYLMLGDG…	703	11	-	29	29	5	5	1.795	*	1.7115	0.118087	gnl|ZmGDB|GRMZM2G062613_P01	100	0	gi|226494765|ref|NP_001142287.1|	uncharacterized protein LOC100274456 precursor [Zea mays]	56.9	0	sp|Q9SSG3|HIPL1_ARATH	HIPL1 protein OS=Arabidopsis thaliana GN=HIPL1 PE=1 SV=2	100	0	B4G154	B4G154_MAIZE Putative uncharacterized protein OS=Zea mays PE=2 SV=1	BH2090	66.2	2e-10	COG2133	Glucose/sorbosone dehydrogenases	G	Carbohydrate transport and metabolism ;	-	GO:0005975//carbohydrate metabolic process	GO:0016901//oxidoreductase activity, acting on the CH-OH group of donors, quinone or similar compound as acceptor;GO:0048038//quinone binding	GO:0046658//anchored to plasma membrane;GO:0016023//cytoplasmic membrane-bounded vesicle;GO:0005739//mitochondrion
	gnl|ZmGDB|GRMZM2G079440_P01	seq=translation; coord=6:137142553..137144384:-1; parent_transcript=GRMZM2G079440_P01; parent_gene=	21324	MEYGQQGQRGHGATGHVDQYGNPVGGVEHGTGGMRHGTGTTGGMGQLGEHGGAGMGGGQFQPAREEHKTGGILHRSGSSSSSSSEDDGMGGRRKKGIKEKIKEKLPGGHKDDQHATATTGGAYGQQGHTGSAYGQQGHTGGAYATGTEGTGEKKGIMDKIKEKLPGQH	905	36.9	-	18	18	3	3	1.456	*	3.132	2.37022	gnl|ZmGDB|GRMZM2G079440_P01	100	2e-24	gi|126632260|emb|CAM56275.1|	RAB17 protein [Zea mays] >gi|126632262|emb|CAM56276.1| RAB17 protein [Zea mays] >gi|126632264|emb|CAM56277.1| RAB17 protein [Zea mays] >gi|126632266|emb|CAM56278.1| RAB17 protein [Zea mays] >gi|413944962|gb|AFW77611.1| dehydrin1 [Zea mays]	99.4	4e-24	sp|P12950|DHN1_MAIZE	Dehydrin DHN1 OS=Zea mays GN=DHN1 PE=1 SV=2	100	2e-23	A3KLI1	A3KLI1_MAIZE RAB17 protein OS=Zea mays GN=rab17 PE=2 SV=1	-	-	-	-	-	-	-	-	-	-
	gnl|ZmGDB|GRMZM2G084812_P01	seq=translation; coord=6:124803945..124805261:1; parent_transcript=GRMZM2G084812_P01; parent_gene=G	41166	MQRSGFAPGMAGYVNITQHRGGKVSFIVDDAADSVKPVTYVKQIESHRYDYSVLQVSGVLSSPEAEAPVAPPAPVNLTDILSKKYCKSFAGLLAADPKVFDTLNGTKDTALTVFCPVDAAVAAFMPKFKNLTAKAKTAILLYHAVPDYYSMQFLKSNKGKVTTLATTSVAKKDYTYEAESKDDTVTLDTTVVTSTIQATVRDDDPLAVYACSKFLQPKELFKAKTADLAPAPAPQGPKKKSKKKPTGTSAASAPSDDESADGPSADDDSSDDAADKAAAAPSYLSARWVTAAVTTAVALALAA	968	22.8	-	22	22	4	4	1.246	*	1.7095	0.655488	gnl|ZmGDB|GRMZM2G084812_P01	100	8e-110	gi|413944554|gb|AFW77203.1|	fasciclin-like arabinogalactan protein 8 [Zea mays]	47.56	3e-37	sp|Q9SU13|FLA2_ARATH	Fasciclin-like arabinogalactan protein 2 OS=Arabidopsis thaliana GN=FLA2 PE=1 SV=1	100	4e-42	B4FRU7	B4FRU7_MAIZE Putative uncharacterized protein OS=Zea mays PE=2 SV=1	-	-	-	-	-	-	-	-	-	-	GO:0016023//cytoplasmic membrane-bounded vesicle
	gnl|ZmGDB|GRMZM2G122302_P01	seq=translation; coord=6:111182254..111183500:-1; parent_transcript=GRMZM2G122302_P01; parent_gene=	24651	MASGGASSLALAALLLVSCASAAVATKYTVGDASGWTTTGDYATWASGKKFKVGDSLEFKYAGGAHTVDEVSAADYAACSSSNALSTDSAGATTVTLKTAGKHYFICGVAGHCSSGMKLVVDVAKAVAAPAPAPAAAAAPAPAADTAPDAPDTTPSTPTSPSSSGGRTPKSPDTTVLSPPDKKSTSSGATGLSAAAWAGLGLAGLVAVHLGAF	196	14.1	-	7	7	2	2	1.32	*	1.8495	0.748826	gnl|ZmGDB|GRMZM2G122302_P01	100	1e-53	gi|413944083|gb|AFW76732.1|	blue copper protein [Zea mays]	66.33	2e-31	sp|Q41001|BCP_PEA	Blue copper protein OS=Pisum sativum PE=2 SV=1	100	1e-32	B6TZ15	B6TZ15_MAIZE Putative uncharacterized protein OS=Zea mays PE=2 SV=1	-	-	-	-	-	-	-	-	-	GO:0005507//copper ion binding;GO:0009055//electron carrier activity	GO:0016023//cytoplasmic membrane-bounded vesicle
	gnl|ZmGDB|GRMZM2G136895_P01	seq=translation; coord=10:144683393..144689170:-1; parent_transcript=GRMZM2G136895_P01; parent_gene	91247	MSASSPASAALAATVAAAAALLLLLLLCCPNVARAQTPAFACDASNATLASYGFCNRSAAAAARAADLVSRLTLAEKVGFLVDKQAALPRLGVPLYEWWSEALHGVSYVGPGTRFSPLVPGATSFPQPILTAASFNATLFRAIGEVVSNEARAMHNVGLAGLTFWSPNINIFRDPRWGRGQETPGEDPLLTSKYAVGYVTGLQGAVSGAGALKVAACCKHYTAYDVDNWKGVERYTFDAVVSQQDLDDTFQPPFKSCVVDGNVASVMCSYNQVNGKPTCADKDLLSGVIRGDWKLNGYISSDCDSVDVLYNNQHYTKTPEDAAAISIKAGLDLNCGTFLAQHTVAAVQAGKLSESDVDRAVTNNLVTLMRLGFFDGDPRELPFGNLGPSDVCTPSNQEL…	928	18	-	30	29	11	10	0.733	*	0.755	0.0311127	gnl|ZmGDB|GRMZM2G136895_P01	100	0	gi|226491558|ref|NP_001146416.1|	uncharacterized protein LOC100279996 [Zea mays]	69.99	0	sp|Q9FLG1|BXL4_ARATH	Beta-D-xylosidase 4 OS=Arabidopsis thaliana GN=BXL4 PE=1 SV=1	100	0	C0PD28	C0PD28_MAIZE Putative uncharacterized protein OS=Zea mays PE=2 SV=1	XF0845	291	4e-78	COG1472	Beta-glucosidase-related glycosidases	G	Carbohydrate transport and metabolism ;	K15920|1|0.0|1432|sbi:SORBI_06g030270|beta-D-xylosidase 4 [EC:3.2.1.37]	GO:0045493//xylan catabolic process	GO:0009044//xylan 1,4-beta-xylosidase activity	GO:0016023//cytoplasmic membrane-bounded vesicle;GO:0005618//cell wall;GO:0048046//apoplast
	gnl|ZmGDB|GRMZM2G141277_P01	seq=translation; coord=8:109218692..109219673:-1; parent_transcript=GRMZM2G141277_P01; parent_gene=	26395	MALEPLRHGLVSLLVLLLLLVHAASAARARDLHLEMVTTSAATARAVPSCASWRLGVETNNIRDWYSIPAECRGYVRDYMYGDLFRQDCAVVAREAAAYAEGLELGGDGKEVWVFDVDDTTLSNLPYYADTGFGAEPYNATYFDEYVANATAPPLPEVLQLYETLLSLGIKVVFITGRHDYEKEPTIKNLRSAGYHTWDKLVLKYVNFLIFAYQVG	56	4.2	-	3	3	1	1	2.365	*	1.9085	0.645588	gnl|ZmGDB|GRMZM2G141277_P01	100	1e-84	gi|226500486|ref|NP_001148494.1|	stem 28 kDa glycoprotein precursor [Zea mays] >gi|195619786|gb|ACG31723.1| stem 28 kDa glycoprotein precursor [Zea mays]	46.79	9e-35	sp|P27061|PPA1_SOLLC	Acid phosphatase 1 OS=Solanum lycopersicum GN=APS1 PE=2 SV=1	100	9e-84	B6T3P0	B6T3P0_MAIZE Stem 28 kDa glycoprotein OS=Zea mays PE=2 SV=1	-	-	-	-	-	-	-	-	-	GO:0003993//acid phosphatase activity	-
	gnl|ZmGDB|GRMZM2G162486_P01	seq=translation; coord=9:138752306..138754760:1; parent_transcript=GRMZM2G162486_P01; parent_gene=G	33809	MAAAAPASSVKEVLPSPLTSASEPPPLFDGTTRLYVAYLCPFAQRAWIARNYKGLQDKIKIVAIDLADRPAWYKEKVYPENKVPSLEHDNQVKGESLDLVKYIDSNFEGPSLLPEDHAKQQFAEELLGYTDAFNKAFYSCLVDREDVSEEAVAALDKIEDALGKFNDGPFFLGQFSLVDVAYVPFIERFQILYSNIKNYDVTKGRPNLQKFIEEVNKIDAYTQTKLDPQFLLEQTKKRLGIA	443	30.2	-	15	8	5	3	1.95	*	1.6235	0.461741	gnl|ZmGDB|GRMZM2G162486_P01	100	3e-139	gi|413956118|gb|AFW88767.1|	IN2-1 protein [Zea mays]	86.38	2e-116	sp|A1XBB7|IN21B_ORYSI	Protein IN2-1 homolog B OS=Oryza sativa subsp. indica GN=GSTZ5 PE=1 SV=1	100	3e-138	B4FUN3	B4FUN3_MAIZE Putative uncharacterized protein OS=Zea mays PE=2 SV=1	all4902	68.9	7e-12	COG0625	Glutathione S-transferase	O	Posttranslational modification, protein turnover, chaperones ;	K00799|1|5e-129|457|zma:100282747|glutathione S-transferase [EC:2.5.1.18]	GO:0046686//response to cadmium ion;GO:0010731//protein glutathionylation	GO:0004364//glutathione transferase activity	GO:0009570//chloroplast stroma
	gnl|ZmGDB|GRMZM2G168588_P01	seq=translation; coord=7:147155879..147158705:-1; parent_transcript=GRMZM2G168588_P01; parent_gene=	40756	MAPLPASLMPCLWLFLCLLAAPCPAARAARFACNATAPRASTCQALVSYAPPNGTATPTLAAVRALFQLRSHRALLAANGLPLSTPPTAPAPVPLRVRLPCLCSGGAGATFQRPTYRVRAGDTLDAVARGVFAGLVTYQDIAAANNVSDPNRVAVGQQLWIPVPCSCDLVGGQPVVHFTYVVPAGGSVSSIAEEFGTTEETILTLNKMPDAKSLLAGQVLDVPLRACSSAISSTAIDRNLLVPNGSYILTANNCVKCGCSSSTWQLDCQSTQGLSSSFCPAAKCGDMFLGNTSSSTSSCESTACSYAGYTNSTSFAILANVTTTNVCNAGMTPTAQPAHSSALRLEPVWLRWTELVALSLFTLSFFV	215	3.5	-	5	5	1	1	1.49	*	2.596	1.56412	gnl|ZmGDB|GRMZM2G168588_P01	100	1e-172	gi|224035617|gb|ACN36884.1|	unknown [Zea mays] >gi|414886638|tpg|DAA62652.1| TPA: hypothetical protein ZEAMMB73_040438 [Zea mays]	43.28	6e-54	sp|Q8H8C7|CEBIP_ORYSJ	Chitin elicitor-binding protein OS=Oryza sativa subsp. japonica GN=CEBIP PE=1 SV=1	100	1e-171	C0PNW8	C0PNW8_MAIZE Putative uncharacterized protein OS=Zea mays PE=2 SV=1	-	-	-	-	-	-	-	K13473|1|1e-54|211|osa:4331523|chitin elicitor-binding protein!K13429|3|6e-06|50.1|ppp:PHYPADRAFT_1279|chitin elicitor receptor kinase 1	GO:0016998//cell wall macromolecule catabolic process	-	-
	gnl|ZmGDB|GRMZM2G170044_P01	seq=translation; coord=7:16096163..16099019:1; parent_transcript=GRMZM2G170044_P01; parent_gene=GRM	23788	MESRRRAVPTVTAVAVATLLLTMMTSSGVGGDFAADRAECSEQLAGLATCLTYVQEQATATAPTPDCCAGLKAVLQSSRKCLCVLVKDRDDPNLGLKLNVDKALGLPAVCHAPANISDCPRLLDLPAGSKDAQVFEQYAKQQAAAAAQGGAPTSGRSSAAASTTAGAQKSGASAAGRWLGVGRVGGAGGGARAVAPLAVPFLLLLG	143	9.2	-	7	7	2	2	3.072	*	2.4755	0.843578	gnl|ZmGDB|GRMZM2G170044_P01	100	8e-57	gi|293333456|ref|NP_001170312.1|	putative bifunctional inhibitor/LTP/seed storage protein family precursor [Zea mays] >gi|224034981|gb|ACN36566.1| unknown [Zea mays] >gi|414883918|tpg|DAA59932.1| TPA: putative bifunctional inhibitor/LTP/seed storage protein family [Zea mays]	40.23	1e-07	sp|Q8VYI9|NLTL5_ARATH	Non-specific lipid-transfer protein-like protein At5g64080 OS=Arabidopsis thaliana GN=At5g64080 PE=1 SV=1	100	3e-53	B6UAB8	B6UAB8_MAIZE Lipid binding protein OS=Zea mays PE=2 SV=1	-	-	-	-	-	-	-	-	GO:0006869//lipid transport	GO:0008289//lipid binding	GO:0016023//cytoplasmic membrane-bounded vesicle
	gnl|ZmGDB|GRMZM2G177242_P01	seq=translation; coord=3:15061320..15062756:1; parent_transcript=GRMZM2G177242_P01; parent_gene=GRM	30429	MHRSRPPSVAVAAMQRLVRVLVVLGVAAAASAQGPTAAPTTPTPATPAAPAPATASSNITGVLAKAGQFNTFIRLLKSTGVASQIDNQVANGGNGVTVFAPTDNAFQSLPSGTLNSLSDQDKNALVQYHVVSTAIPMSQFDTVSNPLRTQAGSASPGEFPLNVTSSEGQQVNVTTGVVTATVDNSLYSGDSLVVYQVNKVLLPMKLFGAAEAPAPAPLAPAKKKGKTPAAVADSPDAAEASPDATTTSLAPARLTRGGLATALALAGVWWGL	87	3.3	-	7	7	1	1	1.77	*	2.744	1.37744	gnl|ZmGDB|GRMZM2G177242_P01	100	2e-74	gi|414876249|tpg|DAA53380.1|	TPA: fasciclin-like arabinogalactan protein 7 [Zea mays]	66.01	3e-41	sp|Q8LEJ6|FLA11_ARATH	Fasciclin-like arabinogalactan protein 11 OS=Arabidopsis thaliana GN=FLA11 PE=2 SV=2	100	2e-73	B4FU73	B4FU73_MAIZE Putative uncharacterized protein OS=Zea mays PE=2 SV=1	all4894	50.1	4e-06	COG2335	Secreted and surface protein containing fasciclin-like repeats	M	Cell wall/membrane/envelope biogenesis ;	-	-	-	GO:0016023//cytoplasmic membrane-bounded vesicle
	gnl|ZmGDB|GRMZM2G314652_P01	seq=translation; coord=3:71260323..71276934:1; parent_transcript=GRMZM2G314652_P01; parent_gene=GRM	50787	MTLLCVPLVGRTVEEMITDAAAAAATGGDMVEIRLDFIQGFRPREHLPPLLRGCPLPALVTYRPVWEGGQYEGDDTTRFETLRLAMELGVDYVDIELKVADKFMSFIAGHKPEKCKLIVSSHNYEYTPSCEEITNLVASIQAVGADIVKVATTAKDIVDVSRMFQVMVHCQVPMIGLVMSEKGLMSRVLAPKFGGYLTFGILNATKTSASGQPTVEDLLDIYNIKCIGPDTKILGLIANPVKQSKSPILHNKCLQSIGYNAVYLPLLGDNLASFLETYSSPDFSGFSCSLPFKVDAVQCCDEHDPVAKSIGAINTIIRRPDGKLVGYNTDYIGAISAIEDGIGGPGSKDAVISPLAGRLIVVVGAGGAGKAIAYGAKEKGARVVIANRTYGKISISTIH…	132	7.5	1	5	5	3	3	1.378	*	1.9715	0.839336	gnl|ZmGDB|GRMZM2G314652_P01	100	0	gi|414877458|tpg|DAA54589.1|	TPA: hypothetical protein ZEAMMB73_882303 [Zea mays]	60.51	4e-124	sp|Q9SQT8|DHQSD_ARATH	Bifunctional 3-dehydroquinate dehydratase/shikimate dehydrogenase, chloroplastic OS=Arabidopsis thaliana GN=EMB3004 PE=1 SV=1	99.74	0	B6UCV5	B6UCV5_MAIZE Shikimate biosynthesis protein aroDE OS=Zea mays PE=2 SV=1	MJ1454	112	1e-24	COG0710	3-dehydroquinate dehydratase	E	Amino acid transport and metabolism ;	K13832|1|0.0|745|zma:100285997|3-dehydroquinate dehydratase / shikimate dehydrogenase [EC:4.2.1.10 1.1.1.25]	GO:0055114//oxidation-reduction process;GO:0019632//shikimate metabolic process	GO:0050661//NADP binding;GO:0003855//3-dehydroquinate dehydratase activity;GO:0004764//shikimate 3-dehydrogenase (NADP+) activity	GO:0016023//cytoplasmic membrane-bounded vesicle;GO:0009570//chloroplast stroma
	gnl|ZmGDB|GRMZM2G319281_P02	seq=translation; coord=1:257975550..257977975:1; parent_transcript=GRMZM2G319281_P02; parent_gene=G	31965	MAAAAAGEDDAAWERAISAATKSTSAPKTLTLDGAVKSSTGGLPSAALLERFAASLEELSVAGARLSSLAGLPRLPALRRLSLPDNRLSGAAALAAVAEACGATLRHLDLGNNRFAEVQELAPLAGVRVESLDLFQCPVTKVKGYRDEVFALIPSLKYLDGADAEGNERLETDDDDDEEEDDEEGEEGPEGEEEGDEDDGEEEDDEDGEGDDEEEGDEEAEDEDGEAEDDELDADAEDKENIESKAGSSLPNKRKRNNEDDANGYK	564	24.4	-	17	17	6	6	1.725	*	1.6935	0.0445477	gnl|ZmGDB|GRMZM2G319281_P02	100	5e-59	gi|414871994|tpg|DAA50551.1|	TPA: acidic leucine-rich nuclear phosphoprotein 32 family member A [Zea mays]	83.78	2e-41	sp|Q7Y180|AN322_ORYSJ	Acidic leucine-rich nuclear phosphoprotein 32-related protein 2 OS=Oryza sativa subsp. japonica GN=Os03g0668900 PE=2 SV=1	100	3e-07	B6UHU4	B6UHU4_MAIZE Acidic leucine-rich nuclear phosphoprotein 32 family member A OS=Zea mays PE=2 SV=1	-	-	-	-	-	-	-	-	-	-
	gnl|ZmGDB|GRMZM2G427451_P01	seq=translation; coord=1:191893507..191894902:1; parent_transcript=GRMZM2G427451_P01; parent_gene=G	29468	MPRHLALLLPLLLLASPAATRLASAACAGEKFPAGRAYASCEDLPKLGASLHWTYDASKSSLSVAFVAAPAAAGGWVAWGLNPTGEGMAGAQALVALAGAGAAAPAVRTYNITGYVPLGKASTPLDFPATDLAADAAGGKIRVYGKLQLRKGMKAVNQVWQVGASSTGGAPDKHAFQADNLGAKSKLVLAGKAPAAAEAPSPALAPEAGGPSAGGDSGAGASSSTAPSKSPNAAVPAAGVSAPALLALALVGFLAAVW	444	20.2	-	15	15	3	3	1.519	*	1.728	0.295571	gnl|ZmGDB|GRMZM2G427451_P01	100	4e-51	gi|224033231|gb|ACN35691.1|	unknown [Zea mays]	46.05	3e-16	sp|Q94BT2|AIR12_ARATH	Auxin-induced in root cultures protein 12 OS=Arabidopsis thaliana GN=AIR12 PE=1 SV=3	100	4e-50	C0PKH5	C0PKH5_MAIZE Putative uncharacterized protein OS=Zea mays PE=2 SV=1	-	-	-	-	-	-	-	-	-	-	GO:0016023//cytoplasmic membrane-bounded vesicle
Hits	Accession	Desription	Mass	Seq	Score	Cov	SameSets	Spectrum	Unique Spectrum	Peptide	Unique Peptide	Expression ratio in the SM9 line at the VT stage under LP as LP vs. NP	Expression significance in the SM9 line at the VT stage under LP as LP vs. NP	C-VS-Z@Mean	C-VS-Z@SD	Accession	NCBInr Identity	NCBInr E_Value	NCBInr Accession	NCBInr Description	Uniprot_Swissprot Identity	Uniprot_Swissprot E_Value	Uniprot_Swissprot Accession	Uniprot_Swissprot Description	Uniprot_Tremble Identity	Uniprot_Tremble E_Value	Uniprot_Tremble Accession	Uniprot_Tremble Description	Protein_or_Domain	COG Identity	COG E-Value	COG_ID	COG Function-Description	COG Code	COG Functional-Categories	KEGG(ko_id|rank|evalue|score|identity|ko_definition)	GO Biological_Process	GO Molecular_Function	GO Cellular_Component
	gnl|ZmGDB|GRMZM2G001514_P01	seq=translation; coord=8:69592559..69594672:1; parent_transcript=GRMZM2G001514_P01; parent_gene=GRM	35480	MATTSTPRLATLLVLLAAASPLLSAAQKAAPKAPAAAKAAPGPAASSSSGAGAADAAPPTDVNKALKDDQFSEFKQLLHDTRVDTQINAQLTDSYNGLTIMAPTNAAFDKMKAGVLNGLSPQDQIQLVLYCVLPRFYSLSMLGTLDGKVNTQGSGHDGPYRYDIKRSGNNVNVSTGVNWMLLGSPVSKDFPLAIYPVDKVPLPYELFGPKPPTPAPAPAPAPAKSKTKKKKKAAGIAEPPTADDDTSASDDQKAAATPGAAGSWAAAALSALAAAALGAGLF	291	8.5	-	15	5	2	1	2.039	*	2.8415	1.13491	gnl|ZmGDB|GRMZM2G001514_P01	100	2e-75	gi|413948476|gb|AFW81125.1|	fasciclin-like arabinogalactan protein 7 [Zea mays]	46.48	2e-21	sp|Q9SIL7|FLA6_ARATH	Fasciclin-like arabinogalactan protein 6 OS=Arabidopsis thaliana GN=FLA6 PE=2 SV=2	99.29	1e-48	B6TE21	B6TE21_MAIZE Fasciclin-like arabinogalactan protein 7 OS=Zea mays PE=2 SV=1	-	-	-	-	-	-	-	-	-	-
	gnl|ZmGDB|GRMZM2G010048_P01	seq=translation; coord=5:14814824..14815810:1; parent_transcript=GRMZM2G010048_P01; parent_gene=GRM	26476	MRVSSNPQPHGPEMASVLRVLALLLVAAAVADAASIVVTNKCAYTVWPAALPGGGTVLNTGESWPIDVPAGTRSGRVWGRTGCGFVTNGTLGQCQTGDCGGTLACSKVGFEPITLAEYSLGGTGADRFDISLVHGFNAPMSFLPASGGGGGARCGRGGPSCPVQEITFDCPSEQRRVAGCGNPCDGKSSSCGPNNGTEYFKKACPQTITYPRDTTNTVFTCPAGTSYEITFCP	536	8.6	-	7	7	1	1	1.977	*	1.665	0.441235	gnl|ZmGDB|GRMZM2G010048_P01	100	4e-103	gi|413933505|gb|AFW68056.1|	putative thaumatin domain family protein [Zea mays]	57.14	4e-22	sp|P50698|RST4_AVESA	Thaumatin-like pathogenesis-related protein 4 OS=Avena sativa GN=RASTL-4 PE=2 SV=1	86.22	3e-87	C5WQD8	C5WQD8_SORBI Putative uncharacterized protein Sb01g012700 OS=Sorghum bicolor GN=Sb01g012700 PE=4 SV=1	-	-	-	-	-	-	-	-	-	-	GO:0016023//cytoplasmic membrane-bounded vesicle
	gnl|ZmGDB|GRMZM2G028307_P02	seq=translation; coord=10:16487570..16504336:1; parent_transcript=GRMZM2G028307_P02; parent_gene=GR	82689	MGARATSPPPWRRHCLCRALHFLVLLLWGTSEANKEQAMLPPRGWNSYDSFSWIVDENAYLQNAQIMTEKLLPHGYQYAVIDFLWYRKYVDGAYTDSYGFDNIDEWGRPFPDLQRFPSSRVDRGFSQIASKVHGMGLKFGIHLMKGISVQAVNADTPILDIKTGKPYLEDGRQWTARDIGLSHRTCAWMTHGFMSVNTNIGAGRAFLRSLYRQYADWGVDFVKVDCIFGTDYSPEEIITISELLQEIDRPIILSISPGTAVTPALAENISDHVNMYRITGDDWDNWKDVSSHFGVSSSFATAKKIGATGLRGRSWPDLDMLPFGWLTDPSVNQGPHRKCNLTLDEQKAQMALWSMTKSPLMYGGDLRNLDDSTLNIITNSGLLKINHYSRNNMEFHYVH…	161	7.3	-	6	6	4	4	3.304	*	2.364	1.32936	gnl|ZmGDB|GRMZM2G028307_P02	100	2e-124	gi|293333891|ref|NP_001170663.1|	uncharacterized protein LOC100384721 [Zea mays]	37.17	2e-08	sp|A7XZT2|AGALB_TALEM	Probable alpha-galactosidase B OS=Talaromyces emersonii PE=3 SV=1	100	0	C0PAL4	C0PAL4_MAIZE Putative uncharacterized protein OS=Zea mays PE=2 SV=1	-	-	-	-	-	-	-	K07407|1|9e-21|100|gmx:100804260|alpha-galactosidase [EC:3.2.1.22]	-	GO:0004553//hydrolase activity, hydrolyzing O-glycosyl compounds	GO:0005739//mitochondrion
	gnl|ZmGDB|GRMZM2G028821_P01	seq=translation; coord=1:81602813..81603918:-1; parent_transcript=GRMZM2G028821_P01; parent_gene=GR	26441	MAGEEGLKVLGLQVSPFVLRVCLALNMKGVSYEYVEEDISNKSELLLKSNPVHKKVPVLIHNGKPICESLVIMQYVDELFAGRPILPTDPYERATARFWAAYADDKLFPAWYGMVKAQAEEERAEKAKETLAAIEHMEVTFAKCSGGNAFFGGDSIGYVDIVLTCSAPSCSGSRRCAGFSTWRSLTLARLRCWLRGRSGL	94	11	-	4	4	2	2	3.39	*	2.4365	1.34845	gnl|ZmGDB|GRMZM2G028821_P01	100	3e-102	gi|195650085|gb|ACG44510.1|	glutathione S-transferase GSTU6 [Zea mays] >gi|414867472|tpg|DAA46029.1| TPA: glutathione S-transferase GSTU6 [Zea mays]	54.74	2e-26	sp|Q9FUT0|GSTU9_ARATH	Glutathione S-transferase U9 OS=Arabidopsis thaliana GN=GSTU9 PE=2 SV=1	100	3e-101	B6U577	B6U577_MAIZE Glutathione S-transferase GSTU6 OS=Zea mays PE=2 SV=1	XF0911	60.8	1e-09	COG0625	Glutathione S-transferase	O	Posttranslational modification, protein turnover, chaperones ;	K00799|1|2e-51|199|sbi:SORBI_01g030930|glutathione S-transferase [EC:2.5.1.18]	GO:0009628//response to abiotic stimulus;GO:0009791//post-embryonic development	GO:0004364//glutathione transferase activity	-
	gnl|ZmGDB|GRMZM2G036134_P01	seq=translation; coord=7:170988796..170991237:1; parent_transcript=GRMZM2G036134_P01; parent_gene=G	49600	MRRVGTGVRMLCGAALSVLLLLAGGAAASHSRSSCPATPPDAGNTLQVSHAFGPCSPLGPGTAAPSWAGFLADQASRDASRLLYLDSLAVRGRARAYAPIASGRQLLQTPTYVVRASLGTPPQQLLLAVDTSNDASWIPCAGCAGCPTSSAAPFDPASSASYRTVPCGSPLCAQAPNAACPPGGKACGFSLTYADSSLQAALSQDSLAVAGNAVKAYTFGCLQRATGTAAPPQGLLGLGRGPLSFLSQTKDMYEATFSYCLPSFKSLNFSGTLRLGRNGQPQRIKTTPLLANPHRSSLYYVNMTGIRVGRKVVPIPAFDPATGAGTVLDSGTMFTRLVAPAYVAVRDEVRRRVGAPVSSLGGFDTCFNTTAVAWPPVTLLFDGMQVTLPEENVVIHSTY…	1070	19.3	-	44	44	8	8	3.673	*	3.6195	0.0756604	gnl|ZmGDB|GRMZM2G036134_P01	100	0	gi|212275143|ref|NP_001130306.1|	uncharacterized protein LOC100191400 precursor [Zea mays] >gi|414887962|tpg|DAA63976.1| TPA: aspartic proteinase nepenthesin-1 [Zea mays]	35.45	3e-31	sp|Q9LHE3|ASPG2_ARATH	Protein ASPARTIC PROTEASE IN GUARD CELL 2 OS=Arabidopsis thaliana GN=ASPG2 PE=2 SV=1	100	0	B4F8P0	B4F8P0_MAIZE Putative uncharacterized protein OS=Zea mays PE=2 SV=1	-	-	-	-	-	-	-	K00924|1|1e-14|79.3|aly:ARALYDRAFT_489138|[EC:2.7.1.-]	GO:0006508//proteolysis	GO:0004190//aspartic-type endopeptidase activity	GO:0009505//plant-type cell wall;GO:0016023//cytoplasmic membrane-bounded vesicle;GO:0009507//chloroplast;GO:0048046//apoplast
	gnl|ZmGDB|GRMZM2G050730_P01	seq=translation; coord=10:4991168..4992194:1; parent_transcript=GRMZM2G050730_P01; parent_gene=GRMZ	13941	MGEVKHLCLAKFKDGVVVDDVLKGMTDLAAGMDTVKSFEWGQDVLNQEMLTQGFTHVFSLTFASAADLAAYMAHDSHTAFAATFMAAIDKVLVVDFPVVVAKPPPPA	155	23.4	-	4	4	2	2	1.77	*	2.1275	0.505581	gnl|ZmGDB|GRMZM2G050730_P01	100	1e-08	gi|413916098|gb|AFW56030.1|	hypothetical protein ZEAMMB73_733539 [Zea mays]	48.81	3e-16	sp|Q9FK81|Y5258_ARATH	Uncharacterized protein At5g22580 OS=Arabidopsis thaliana GN=At5g22580 PE=1 SV=1	100	1e-31	B6UFF4	B6UFF4_MAIZE Pop3 peptide OS=Zea mays PE=4 SV=1	-	-	-	-	-	-	-	-	-	-	GO:0016023//cytoplasmic membrane-bounded vesicle;GO:0009507//chloroplast
	gnl|ZmGDB|GRMZM2G062613_P01	seq=translation; coord=3:93985804..93989199:1; parent_transcript=GRMZM2G062613_P01; parent_gene=GRM	82781	MKMLRRLMLSLSFILLLPSYLAYPLCTDARAPVLLNTTLKFCASPSRNSRGCCDATADAALSKQFDAMAISDAACAAVVKSILCAKCSPYSADLFGAGPKIRTVPSLCNSTSSANSAESKETTTTTTQDYCKLVWDTCKDVSIASSPFQPPLQGTAPPPTSPSKLTDAWQSQSDFCGSFGGRSSVCLSGDTVSFNAAGPSPSPRPEPRGVCLERIDNGSYLSLAPHPDGSSRIFLGSQAGKIWLATVPEQGSGGALQFEGAGPFVDLTDQVHFDSALGLMGMAFHPGFATNGRFFASYNCDRTKSPSCTGRCSCNSDVGCDPSKLGTDSGAQPCQYQVVVSEYSARGSAAANVSQATSAADPSEVRRIFAMGLPYTSGHGGQVLFGPADGYLYLMLGDG…	703	11	-	29	29	5	5	3.611	*	2.5375	1.51816	gnl|ZmGDB|GRMZM2G062613_P01	100	0	gi|226494765|ref|NP_001142287.1|	uncharacterized protein LOC100274456 precursor [Zea mays]	56.9	0	sp|Q9SSG3|HIPL1_ARATH	HIPL1 protein OS=Arabidopsis thaliana GN=HIPL1 PE=1 SV=2	100	0	B4G154	B4G154_MAIZE Putative uncharacterized protein OS=Zea mays PE=2 SV=1	BH2090	66.2	2e-10	COG2133	Glucose/sorbosone dehydrogenases	G	Carbohydrate transport and metabolism ;	-	GO:0005975//carbohydrate metabolic process	GO:0016901//oxidoreductase activity, acting on the CH-OH group of donors, quinone or similar compound as acceptor;GO:0048038//quinone binding	GO:0046658//anchored to plasma membrane;GO:0016023//cytoplasmic membrane-bounded vesicle;GO:0005739//mitochondrion
	gnl|ZmGDB|GRMZM2G079440_P01	seq=translation; coord=6:137142553..137144384:-1; parent_transcript=GRMZM2G079440_P01; parent_gene=	21324	MEYGQQGQRGHGATGHVDQYGNPVGGVEHGTGGMRHGTGTTGGMGQLGEHGGAGMGGGQFQPAREEHKTGGILHRSGSSSSSSSEDDGMGGRRKKGIKEKIKEKLPGGHKDDQHATATTGGAYGQQGHTGSAYGQQGHTGGAYATGTEGTGEKKGIMDKIKEKLPGQH	905	36.9	-	18	18	3	3	1.515	*	1.488	0.0381838	gnl|ZmGDB|GRMZM2G079440_P01	100	2e-24	gi|126632260|emb|CAM56275.1|	RAB17 protein [Zea mays] >gi|126632262|emb|CAM56276.1| RAB17 protein [Zea mays] >gi|126632264|emb|CAM56277.1| RAB17 protein [Zea mays] >gi|126632266|emb|CAM56278.1| RAB17 protein [Zea mays] >gi|413944962|gb|AFW77611.1| dehydrin1 [Zea mays]	99.4	4e-24	sp|P12950|DHN1_MAIZE	Dehydrin DHN1 OS=Zea mays GN=DHN1 PE=1 SV=2	100	2e-23	A3KLI1	A3KLI1_MAIZE RAB17 protein OS=Zea mays GN=rab17 PE=2 SV=1	-	-	-	-	-	-	-	-	-	-
	gnl|ZmGDB|GRMZM2G084812_P01	seq=translation; coord=6:124803945..124805261:1; parent_transcript=GRMZM2G084812_P01; parent_gene=G	41166	MQRSGFAPGMAGYVNITQHRGGKVSFIVDDAADSVKPVTYVKQIESHRYDYSVLQVSGVLSSPEAEAPVAPPAPVNLTDILSKKYCKSFAGLLAADPKVFDTLNGTKDTALTVFCPVDAAVAAFMPKFKNLTAKAKTAILLYHAVPDYYSMQFLKSNKGKVTTLATTSVAKKDYTYEAESKDDTVTLDTTVVTSTIQATVRDDDPLAVYACSKFLQPKELFKAKTADLAPAPAPQGPKKKSKKKPTGTSAASAPSDDESADGPSADDDSSDDAADKAAAAPSYLSARWVTAAVTTAVALALAA	968	22.8	-	22	22	4	4	1.458	*	2.3855	1.31168	gnl|ZmGDB|GRMZM2G084812_P01	100	8e-110	gi|413944554|gb|AFW77203.1|	fasciclin-like arabinogalactan protein 8 [Zea mays]	47.56	3e-37	sp|Q9SU13|FLA2_ARATH	Fasciclin-like arabinogalactan protein 2 OS=Arabidopsis thaliana GN=FLA2 PE=1 SV=1	100	4e-42	B4FRU7	B4FRU7_MAIZE Putative uncharacterized protein OS=Zea mays PE=2 SV=1	-	-	-	-	-	-	-	-	-	-	GO:0016023//cytoplasmic membrane-bounded vesicle
	gnl|ZmGDB|GRMZM2G122302_P01	seq=translation; coord=6:111182254..111183500:-1; parent_transcript=GRMZM2G122302_P01; parent_gene=	24651	MASGGASSLALAALLLVSCASAAVATKYTVGDASGWTTTGDYATWASGKKFKVGDSLEFKYAGGAHTVDEVSAADYAACSSSNALSTDSAGATTVTLKTAGKHYFICGVAGHCSSGMKLVVDVAKAVAAPAPAPAAAAAPAPAADTAPDAPDTTPSTPTSPSSSGGRTPKSPDTTVLSPPDKKSTSSGATGLSAAAWAGLGLAGLVAVHLGAF	196	14.1	-	7	7	2	2	3.521	*	4.122	0.849942	gnl|ZmGDB|GRMZM2G122302_P01	100	1e-53	gi|413944083|gb|AFW76732.1|	blue copper protein [Zea mays]	66.33	2e-31	sp|Q41001|BCP_PEA	Blue copper protein OS=Pisum sativum PE=2 SV=1	100	1e-32	B6TZ15	B6TZ15_MAIZE Putative uncharacterized protein OS=Zea mays PE=2 SV=1	-	-	-	-	-	-	-	-	-	GO:0005507//copper ion binding;GO:0009055//electron carrier activity	GO:0016023//cytoplasmic membrane-bounded vesicle
	gnl|ZmGDB|GRMZM2G136895_P01	seq=translation; coord=10:144683393..144689170:-1; parent_transcript=GRMZM2G136895_P01; parent_gene	91247	MSASSPASAALAATVAAAAALLLLLLLCCPNVARAQTPAFACDASNATLASYGFCNRSAAAAARAADLVSRLTLAEKVGFLVDKQAALPRLGVPLYEWWSEALHGVSYVGPGTRFSPLVPGATSFPQPILTAASFNATLFRAIGEVVSNEARAMHNVGLAGLTFWSPNINIFRDPRWGRGQETPGEDPLLTSKYAVGYVTGLQGAVSGAGALKVAACCKHYTAYDVDNWKGVERYTFDAVVSQQDLDDTFQPPFKSCVVDGNVASVMCSYNQVNGKPTCADKDLLSGVIRGDWKLNGYISSDCDSVDVLYNNQHYTKTPEDAAAISIKAGLDLNCGTFLAQHTVAAVQAGKLSESDVDRAVTNNLVTLMRLGFFDGDPRELPFGNLGPSDVCTPSNQEL…	928	18	-	30	29	11	10	1.29	*	1.305	0.0212132	gnl|ZmGDB|GRMZM2G136895_P01	100	0	gi|226491558|ref|NP_001146416.1|	uncharacterized protein LOC100279996 [Zea mays]	69.99	0	sp|Q9FLG1|BXL4_ARATH	Beta-D-xylosidase 4 OS=Arabidopsis thaliana GN=BXL4 PE=1 SV=1	100	0	C0PD28	C0PD28_MAIZE Putative uncharacterized protein OS=Zea mays PE=2 SV=1	XF0845	291	4e-78	COG1472	Beta-glucosidase-related glycosidases	G	Carbohydrate transport and metabolism ;	K15920|1|0.0|1432|sbi:SORBI_06g030270|beta-D-xylosidase 4 [EC:3.2.1.37]	GO:0045493//xylan catabolic process	GO:0009044//xylan 1,4-beta-xylosidase activity	GO:0016023//cytoplasmic membrane-bounded vesicle;GO:0005618//cell wall;GO:0048046//apoplast
	gnl|ZmGDB|GRMZM2G141277_P01	seq=translation; coord=8:109218692..109219673:-1; parent_transcript=GRMZM2G141277_P01; parent_gene=	26395	MALEPLRHGLVSLLVLLLLLVHAASAARARDLHLEMVTTSAATARAVPSCASWRLGVETNNIRDWYSIPAECRGYVRDYMYGDLFRQDCAVVAREAAAYAEGLELGGDGKEVWVFDVDDTTLSNLPYYADTGFGAEPYNATYFDEYVANATAPPLPEVLQLYETLLSLGIKVVFITGRHDYEKEPTIKNLRSAGYHTWDKLVLKYVNFLIFAYQVG	56	4.2	-	3	3	1	1	4.97	*	3.157	2.56397	gnl|ZmGDB|GRMZM2G141277_P01	100	1e-84	gi|226500486|ref|NP_001148494.1|	stem 28 kDa glycoprotein precursor [Zea mays] >gi|195619786|gb|ACG31723.1| stem 28 kDa glycoprotein precursor [Zea mays]	46.79	9e-35	sp|P27061|PPA1_SOLLC	Acid phosphatase 1 OS=Solanum lycopersicum GN=APS1 PE=2 SV=1	100	9e-84	B6T3P0	B6T3P0_MAIZE Stem 28 kDa glycoprotein OS=Zea mays PE=2 SV=1	-	-	-	-	-	-	-	-	-	GO:0003993//acid phosphatase activity	-
	gnl|ZmGDB|GRMZM2G162486_P01	seq=translation; coord=9:138752306..138754760:1; parent_transcript=GRMZM2G162486_P01; parent_gene=G	33809	MAAAAPASSVKEVLPSPLTSASEPPPLFDGTTRLYVAYLCPFAQRAWIARNYKGLQDKIKIVAIDLADRPAWYKEKVYPENKVPSLEHDNQVKGESLDLVKYIDSNFEGPSLLPEDHAKQQFAEELLGYTDAFNKAFYSCLVDREDVSEEAVAALDKIEDALGKFNDGPFFLGQFSLVDVAYVPFIERFQILYSNIKNYDVTKGRPNLQKFIEEVNKIDAYTQTKLDPQFLLEQTKKRLGIA	443	30.2	-	15	8	5	3	1.673	*	1.463	0.296985	gnl|ZmGDB|GRMZM2G162486_P01	100	3e-139	gi|413956118|gb|AFW88767.1|	IN2-1 protein [Zea mays]	86.38	2e-116	sp|A1XBB7|IN21B_ORYSI	Protein IN2-1 homolog B OS=Oryza sativa subsp. indica GN=GSTZ5 PE=1 SV=1	100	3e-138	B4FUN3	B4FUN3_MAIZE Putative uncharacterized protein OS=Zea mays PE=2 SV=1	all4902	68.9	7e-12	COG0625	Glutathione S-transferase	O	Posttranslational modification, protein turnover, chaperones ;	K00799|1|5e-129|457|zma:100282747|glutathione S-transferase [EC:2.5.1.18]	GO:0046686//response to cadmium ion;GO:0010731//protein glutathionylation	GO:0004364//glutathione transferase activity	GO:0009570//chloroplast stroma
	gnl|ZmGDB|GRMZM2G168588_P01	seq=translation; coord=7:147155879..147158705:-1; parent_transcript=GRMZM2G168588_P01; parent_gene=	40756	MAPLPASLMPCLWLFLCLLAAPCPAARAARFACNATAPRASTCQALVSYAPPNGTATPTLAAVRALFQLRSHRALLAANGLPLSTPPTAPAPVPLRVRLPCLCSGGAGATFQRPTYRVRAGDTLDAVARGVFAGLVTYQDIAAANNVSDPNRVAVGQQLWIPVPCSCDLVGGQPVVHFTYVVPAGGSVSSIAEEFGTTEETILTLNKMPDAKSLLAGQVLDVPLRACSSAISSTAIDRNLLVPNGSYILTANNCVKCGCSSSTWQLDCQSTQGLSSSFCPAAKCGDMFLGNTSSSTSSCESTACSYAGYTNSTSFAILANVTTTNVCNAGMTPTAQPAHSSALRLEPVWLRWTELVALSLFTLSFFV	215	3.5	-	5	5	1	1	2.664	*	3.6555	1.40219	gnl|ZmGDB|GRMZM2G168588_P01	100	1e-172	gi|224035617|gb|ACN36884.1|	unknown [Zea mays] >gi|414886638|tpg|DAA62652.1| TPA: hypothetical protein ZEAMMB73_040438 [Zea mays]	43.28	6e-54	sp|Q8H8C7|CEBIP_ORYSJ	Chitin elicitor-binding protein OS=Oryza sativa subsp. japonica GN=CEBIP PE=1 SV=1	100	1e-171	C0PNW8	C0PNW8_MAIZE Putative uncharacterized protein OS=Zea mays PE=2 SV=1	-	-	-	-	-	-	-	K13473|1|1e-54|211|osa:4331523|chitin elicitor-binding protein!K13429|3|6e-06|50.1|ppp:PHYPADRAFT_1279|chitin elicitor receptor kinase 1	GO:0016998//cell wall macromolecule catabolic process	-	-
	gnl|ZmGDB|GRMZM2G170044_P01	seq=translation; coord=7:16096163..16099019:1; parent_transcript=GRMZM2G170044_P01; parent_gene=GRM	23788	MESRRRAVPTVTAVAVATLLLTMMTSSGVGGDFAADRAECSEQLAGLATCLTYVQEQATATAPTPDCCAGLKAVLQSSRKCLCVLVKDRDDPNLGLKLNVDKALGLPAVCHAPANISDCPRLLDLPAGSKDAQVFEQYAKQQAAAAAQGGAPTSGRSSAAASTTAGAQKSGASAAGRWLGVGRVGGAGGGARAVAPLAVPFLLLLG	143	9.2	-	7	7	2	2	4.806	*	4.3405	0.658316	gnl|ZmGDB|GRMZM2G170044_P01	100	8e-57	gi|293333456|ref|NP_001170312.1|	putative bifunctional inhibitor/LTP/seed storage protein family precursor [Zea mays] >gi|224034981|gb|ACN36566.1| unknown [Zea mays] >gi|414883918|tpg|DAA59932.1| TPA: putative bifunctional inhibitor/LTP/seed storage protein family [Zea mays]	40.23	1e-07	sp|Q8VYI9|NLTL5_ARATH	Non-specific lipid-transfer protein-like protein At5g64080 OS=Arabidopsis thaliana GN=At5g64080 PE=1 SV=1	100	3e-53	B6UAB8	B6UAB8_MAIZE Lipid binding protein OS=Zea mays PE=2 SV=1	-	-	-	-	-	-	-	-	GO:0006869//lipid transport	GO:0008289//lipid binding	GO:0016023//cytoplasmic membrane-bounded vesicle
	gnl|ZmGDB|GRMZM2G177242_P01	seq=translation; coord=3:15061320..15062756:1; parent_transcript=GRMZM2G177242_P01; parent_gene=GRM	30429	MHRSRPPSVAVAAMQRLVRVLVVLGVAAAASAQGPTAAPTTPTPATPAAPAPATASSNITGVLAKAGQFNTFIRLLKSTGVASQIDNQVANGGNGVTVFAPTDNAFQSLPSGTLNSLSDQDKNALVQYHVVSTAIPMSQFDTVSNPLRTQAGSASPGEFPLNVTSSEGQQVNVTTGVVTATVDNSLYSGDSLVVYQVNKVLLPMKLFGAAEAPAPAPLAPAKKKGKTPAAVADSPDAAEASPDATTTSLAPARLTRGGLATALALAGVWWGL	87	3.3	-	7	7	1	1	6.196	*	5.618	0.817415	gnl|ZmGDB|GRMZM2G177242_P01	100	2e-74	gi|414876249|tpg|DAA53380.1|	TPA: fasciclin-like arabinogalactan protein 7 [Zea mays]	66.01	3e-41	sp|Q8LEJ6|FLA11_ARATH	Fasciclin-like arabinogalactan protein 11 OS=Arabidopsis thaliana GN=FLA11 PE=2 SV=2	100	2e-73	B4FU73	B4FU73_MAIZE Putative uncharacterized protein OS=Zea mays PE=2 SV=1	all4894	50.1	4e-06	COG2335	Secreted and surface protein containing fasciclin-like repeats	M	Cell wall/membrane/envelope biogenesis ;	-	-	-	GO:0016023//cytoplasmic membrane-bounded vesicle
	gnl|ZmGDB|GRMZM2G314652_P01	seq=translation; coord=3:71260323..71276934:1; parent_transcript=GRMZM2G314652_P01; parent_gene=GRM	50787	MTLLCVPLVGRTVEEMITDAAAAAATGGDMVEIRLDFIQGFRPREHLPPLLRGCPLPALVTYRPVWEGGQYEGDDTTRFETLRLAMELGVDYVDIELKVADKFMSFIAGHKPEKCKLIVSSHNYEYTPSCEEITNLVASIQAVGADIVKVATTAKDIVDVSRMFQVMVHCQVPMIGLVMSEKGLMSRVLAPKFGGYLTFGILNATKTSASGQPTVEDLLDIYNIKCIGPDTKILGLIANPVKQSKSPILHNKCLQSIGYNAVYLPLLGDNLASFLETYSSPDFSGFSCSLPFKVDAVQCCDEHDPVAKSIGAINTIIRRPDGKLVGYNTDYIGAISAIEDGIGGPGSKDAVISPLAGRLIVVVGAGGAGKAIAYGAKEKGARVVIANRTYGKISISTIH…	132	7.5	1	5	5	3	3	1.959	*	1.7075	0.355675	gnl|ZmGDB|GRMZM2G314652_P01	100	0	gi|414877458|tpg|DAA54589.1|	TPA: hypothetical protein ZEAMMB73_882303 [Zea mays]	60.51	4e-124	sp|Q9SQT8|DHQSD_ARATH	Bifunctional 3-dehydroquinate dehydratase/shikimate dehydrogenase, chloroplastic OS=Arabidopsis thaliana GN=EMB3004 PE=1 SV=1	99.74	0	B6UCV5	B6UCV5_MAIZE Shikimate biosynthesis protein aroDE OS=Zea mays PE=2 SV=1	MJ1454	112	1e-24	COG0710	3-dehydroquinate dehydratase	E	Amino acid transport and metabolism ;	K13832|1|0.0|745|zma:100285997|3-dehydroquinate dehydratase / shikimate dehydrogenase [EC:4.2.1.10 1.1.1.25]	GO:0055114//oxidation-reduction process;GO:0019632//shikimate metabolic process	GO:0050661//NADP binding;GO:0003855//3-dehydroquinate dehydratase activity;GO:0004764//shikimate 3-dehydrogenase (NADP+) activity	GO:0016023//cytoplasmic membrane-bounded vesicle;GO:0009570//chloroplast stroma
	gnl|ZmGDB|GRMZM2G319281_P02	seq=translation; coord=1:257975550..257977975:1; parent_transcript=GRMZM2G319281_P02; parent_gene=G	31965	MAAAAAGEDDAAWERAISAATKSTSAPKTLTLDGAVKSSTGGLPSAALLERFAASLEELSVAGARLSSLAGLPRLPALRRLSLPDNRLSGAAALAAVAEACGATLRHLDLGNNRFAEVQELAPLAGVRVESLDLFQCPVTKVKGYRDEVFALIPSLKYLDGADAEGNERLETDDDDDEEEDDEEGEEGPEGEEEGDEDDGEEEDDEDGEGDDEEEGDEEAEDEDGEAEDDELDADAEDKENIESKAGSSLPNKRKRNNEDDANGYK	564	24.4	-	17	17	6	6	2.3	*	1.9135	0.546594	gnl|ZmGDB|GRMZM2G319281_P02	100	5e-59	gi|414871994|tpg|DAA50551.1|	TPA: acidic leucine-rich nuclear phosphoprotein 32 family member A [Zea mays]	83.78	2e-41	sp|Q7Y180|AN322_ORYSJ	Acidic leucine-rich nuclear phosphoprotein 32-related protein 2 OS=Oryza sativa subsp. japonica GN=Os03g0668900 PE=2 SV=1	100	3e-07	B6UHU4	B6UHU4_MAIZE Acidic leucine-rich nuclear phosphoprotein 32 family member A OS=Zea mays PE=2 SV=1	-	-	-	-	-	-	-	-	-	-
	gnl|ZmGDB|GRMZM2G427451_P01	seq=translation; coord=1:191893507..191894902:1; parent_transcript=GRMZM2G427451_P01; parent_gene=G	29468	MPRHLALLLPLLLLASPAATRLASAACAGEKFPAGRAYASCEDLPKLGASLHWTYDASKSSLSVAFVAAPAAAGGWVAWGLNPTGEGMAGAQALVALAGAGAAAPAVRTYNITGYVPLGKASTPLDFPATDLAADAAGGKIRVYGKLQLRKGMKAVNQVWQVGASSTGGAPDKHAFQADNLGAKSKLVLAGKAPAAAEAPSPALAPEAGGPSAGGDSGAGASSSTAPSKSPNAAVPAAGVSAPALLALALVGFLAAVW	444	20.2	-	15	15	3	3	1.728	*	2.336	0.859842	gnl|ZmGDB|GRMZM2G427451_P01	100	4e-51	gi|224033231|gb|ACN35691.1|	unknown [Zea mays]	46.05	3e-16	sp|Q94BT2|AIR12_ARATH	Auxin-induced in root cultures protein 12 OS=Arabidopsis thaliana GN=AIR12 PE=1 SV=3	100	4e-50	C0PKH5	C0PKH5_MAIZE Putative uncharacterized protein OS=Zea mays PE=2 SV=1	-	-	-	-	-	-	-	-	-	-	GO:0016023//cytoplasmic membrane-bounded vesicle
